1 **Title**

2 **Whole genome sequencing for drug resistance profile prediction in**  
3 ***Mycobacterium tuberculosis***

4 **Authors**

5 Sebastian M. Gygli<sup>1,2,#</sup>, Peter M. Keller<sup>3,#</sup>, Marie Ballif<sup>5</sup>, Nicolas Blöchliger<sup>3</sup>, Rico Hömke<sup>3,4</sup>,  
6 Miriam Reinhard<sup>1,2</sup>, Chloé Loiseau<sup>1,2</sup>, Claudia Ritter<sup>3,4</sup>, Peter Sander<sup>3,4</sup>, Sonia Borrell<sup>1,2</sup>,  
7 Jimena Collantes Loo<sup>5</sup>, Anchalee Avihingsanon<sup>6,7</sup>, Joachim Gnokoro<sup>8</sup>, Marcel Yotebieng<sup>9</sup>,  
8 Matthias Egger<sup>5,10\*</sup>, Sebastien Gagneux<sup>1,2\*§</sup>, Erik C. Böttger<sup>3,4\*§</sup>

9 #equal contribution as first authors; \* equal contribution as last authors; §corresponding  
10 authors

11 **Affiliations**

12 <sup>1</sup>Swiss Tropical and Public Health Institute, Basel, Switzerland

13 <sup>2</sup>University of Basel, Basel, Switzerland

14 <sup>3</sup>Institute of Medical Microbiology, University of Zürich, Zürich, Switzerland

15 <sup>4</sup>National Center for Mycobacteria, University of Zürich, Zürich, Switzerland

16 <sup>5</sup>Institute of Social and Preventive Medicine, University of Bern, Bern, Switzerland

17 <sup>6</sup>HIV-NAT/Thai Red Cross AIDS Research Centre, Bangkok, Thailand

18 <sup>7</sup>TB Research Unit, Department of Medicine, Faculty of Medicine, Chulalongkorn  
19 University, Bangkok, Thailand

20 <sup>8</sup>Centre de Prise en Charge de Recherche et de Formation, Yopougon, Abidjan, Côte d'Ivoire

21 <sup>9</sup>The Ohio State University, College of Public Health, Columbus, Ohio, USA

22 <sup>10</sup>Centre for Infectious Disease Epidemiology and Research, University of Cape Town, South  
23 Africa

24 **Corresponding authors**

25 Prof. Erik C. Böttger, MD, University of Zurich, Institute of Medical Microbiology, National  
26 Center for Mycobacteria, Gloriastrasse 28/30, 8006 Zurich, Switzerland; Phone: +41 44 634  
27 2660; Fax: +41 44 634 49 06; email: boettger@imm.uzh.ch

28 Prof. Sebastien Gagneux, PhD, Swiss Tropical and Public Health Institute, Socinstrasse 57,  
29 4002 Basel, Switzerland; Phone: +41 61 284 8369; Fax: +41 61 284 8101; email:  
30 sebastien.gagneux@swisstph.ch

31

32 **One sentence summary**

- 33 Whole genome sequencing of clinical *M. tuberculosis* isolates accurately predicts drug  
34 resistance profiles and may replace culture-based drug susceptibility testing in the future.

## 35 **Abstract**

36 Whole genome sequencing allows rapid detection of drug-resistant *M. tuberculosis* isolates.  
37 However, high-quality data linking quantitative phenotypic drug susceptibility testing (DST)  
38 and genomic data have thus far been lacking.

39 We determined drug resistance profiles of 176 genetically diverse clinical *M. tuberculosis*  
40 isolates from Democratic Republic of the Congo, Ivory Coast, Peru, Thailand and  
41 Switzerland by quantitative phenotypic DST for 11 antituberculous drugs using the BD  
42 BACTEC MGIT 960 system and 7H10 agar dilution to generate a cross-validated phenotypic  
43 DST readout. We compared phenotypic drug susceptibility results with predicted drug  
44 resistance profiles inferred by whole genome sequencing.

45 Both phenotypic DST methods identically classified the strains into resistant/susceptible in  
46 73-99% of the cases, depending on the drug. Changes in minimal inhibitory concentrations  
47 were readily explained by mutations identified by whole genome sequencing. Using the  
48 whole genome sequences we were able to predict quantitative drug resistance levels where  
49 wild type and mutant MIC distributions did not overlap. The utility of genome sequences to  
50 predict quantitative levels of drug resistance was partially limited due to incompletely  
51 understood mechanisms influencing the expression of phenotypic drug resistance. The overall  
52 sensitivity and specificity of whole genome-based DST were 86.8% and 94.5%, respectively.

53 Despite some limitations, whole genome sequencing has high predictive power to infer  
54 resistance profiles without the need for time-consuming phenotypic methods.

## 55 **Introduction**

56 Timely and accurate drug susceptibility testing (DST) of *M. tuberculosis* isolates is vital to  
57 prevent the transmission of multidrug-resistant strains (MDR – resistance to rifampicin and  
58 isoniazid)[1]. However, the slow growth and stringent biosafety requirements of *M.*  
59 *tuberculosis* make obtaining a full DST profile by culture-based techniques a matter of weeks  
60 or months. In addition, culture-based DST is notoriously challenging for several drugs, e.g.  
61 pyrazinamide and ethionamide due to poor drug solubility in commonly used culture media  
62 [2].

63 Drug resistance in *M. tuberculosis* is mainly conferred by chromosomal mutations in a few  
64 genes [3], making it possible to detect drug resistance by sequencing these genes or probing  
65 them by molecular hybridisation [4]. Several commercial tests for the detection of resistance-  
66 associated mutations are available, e.g. the GenoType MTBDRplus V2 (Hain Lifescience  
67 GmbH, Nehren, DE) [5], the AID TB Resistance Line Probe Assay (AID GmbH, Strassberg,  
68 DE) [6]. Line probe assays and the GeneXpert® system (Cepheid, Sunnyvale, CA, USA) are  
69 endorsed by the World Health Organisation (WHO) the detection of rifampicin resistance as  
70 surrogate marker for MDR [7]. These molecular tests demonstrate high sensitivities for drugs  
71 with established target(s) of resistance and for which only a few mutations are responsible for  
72 most resistance *in clinico* (e.g. rifampicin, isoniazid) [4]. However, molecular tests show low  
73 sensitivity for heteroresistant strains (concomitant presence of wild type (wt) and resistant or  
74 multiple different resistant variants in patient isolates), when frequencies of resistant variants  
75 drop below 5-50 % [8, 9]. Furthermore, there are no commercially available tests for many  
76 drugs currently/prospectively in use (e.g. bedaquiline, delamanid, linezolid, p-aminosalicylic  
77 acid).

78 The past years have seen a wealth of genomic data on drug-resistant *M. tuberculosis* become  
79 available [10, 11]. However, phenotypic DST data are lacking for most of the genetic data  
80 sets. In addition, DST data are often limited as the strains were classified as susceptible or  
81 resistant using only a single drug concentration. There is an urgent need to link genotypic and  
82 phenotypic drug resistance readouts to obtain a better understanding of the mechanisms  
83 influencing the evolution and spread of drug resistance in *M. tuberculosis*.

84 WGS of clinical isolates allows for accurate identification of established-resistance-  
85 conferring chromosomal mutations [10, 12, 13] and may ensure adequate treatment in days

86 instead of months. We compared whole genome-based drug resistance profiles with two  
87 culture-based quantitative DST methods for a total of 11 drugs, including all first-line drugs  
88 (rifampicin, isoniazid, ethambutol, pyrazinamide, streptomycin) and an array of second-line  
89 drugs (rifabutin, amikacin, kanamycin A, capreomycin, moxifloxacin, ethionamide).

## 90 **Material and methods**

### 91 *M. tuberculosis* isolates

92 The initial data-set consisted of 190 *M. tuberculosis* isolates. A subset of 61 strains was used  
93 to establish the phenotypic DST methodology. These 61 strains were collected by the Swiss  
94 National Center for Mycobacteria between 2004-2015, and represent a broad spectrum in  
95 geographic origin and drug resistance profiles [14–16]. We then applied the quantitative  
96 DST methodology to 125 clinical isolates from clinics participating in the International  
97 Epidemiology Databases to Evaluate AIDS (IeDEA) [17] in Peru, Thailand, Ivory Coast and  
98 the Democratic Republic of the Congo (supplementary [Table S3](#)). Thirteen strains had to be  
99 excluded due to failed WGS (n = 4, failed library preparation due to low DNA quality),  
100 irreproducible DST results (n = 1), no growth in the 7H10 agar dilution assay (n = 3),  
101 duplication (n = 1), mixed cultures (n = 2, cross-contamination or patient infected with  
102 multiple strains) or transmission clusters (n = 2). The final set consisted of 176 strains.

### 103 **Phenotypic DST**

104 MGIT 960- and 7H10 agar dilution-based phenotypic DST were performed as described  
105 previously [14]. [Table 1](#) lists the epidemiological cut-offs (ECOFF) used [18], supplementary  
106 [Table S2](#) the drug concentrations tested with the MGIT 960 and 7H10 agar-dilution assays  
107 and [Table 2](#) the genes screened for mutations with WGS. Further details are available in the  
108 supplementary materials.

### 109 **Data analysis**

110 The categorical agreement between the MIC determination by MGIT 960 and 7H10 agar  
111 dilution was determined based on the ECOFFS ([Table 1](#)).

112 The numerical variation between the two methods was quantified as the geometric standard  
113 deviation (SD, given with its standard error) of the ratio MIC MGIT 960/MIC agar dilution,  
114 expressed as a number of 2-fold dilutions and denoted by  $\sigma$ . The geometric SD was computed

115 by fitting a log-normal distribution to the ratio MIC MGIT 960/MIC agar dilution as  
116 implemented in the R package fitdistrplus (v.1.0-9) [19]. If the data was compatible with  $\sigma =$   
117 0, the geometric standard deviation could not be estimated and was defined as “not  
118 applicable” (NA). The approach is a generalization of the Bland and Altman method [20],  
119 taking censoring of the data into account. Strains for which the MGIT 960 MIC and 7H10  
120 agar dilution MIC were both left-censored or both right-censored were excluded since no  
121 information on the ratio could be derived.

122 Goodman and Kruskal’s gamma was used to quantify the rank correlation between the two  
123 methods. No correlation could be calculated if the variance for either method was 0 (NA).

124 Distributions of wt and mutant MICs were analysed qualitatively based on the results of  
125 7H10 agar dilution. We divided the dataset into two groups: drugs for which the MIC  
126 distributions of wt and mutant strains did not overlap, and those for which MIC distributions  
127 overlapped.

128 Sensitivities and specificities of WGS-based resistance profile inference were calculated  
129 based on the 7H10 agar dilution results for all drugs, except pyrazinamide – for which the  
130 MGIT 960 results were used, based on resistance/susceptibility at the WHO-defined critical  
131 concentrations and the presence or absence of a putative resistance-associated mutation.

### 132 **Defining clinical breakpoints for high/low-level resistance**

133 The therapeutic window of a drug is defined as the maximal serum concentration which is  
134 considered safe [21]. Mutations can increase the MIC beyond the therapeutic window and  
135 render the drug clinically ineffective. Drugs may have large therapeutic windows beyond the  
136 ECOFF. For these, MIC increases caused by mutations may still be within the therapeutic  
137 window of a drug: these strains might still be treatable by increasing the drug dose. We  
138 analysed the distribution of MICs of mutant strains, and assessed if cut-offs for low-level  
139 (within the therapeutic window) and high-level (beyond the therapeutic window) resistance  
140 were definable.

### 141 **WGS and single nucleotide polymorphism (SNP) calling**

142 WGS and data analysis was performed as previously described [22] and summarised in the  
143 supplementary materials. The performance of WGS-based DST greatly depends on the

144 availability of robust markers of resistance. We therefore focussed on a set of high-  
145 confidence resistance-associated genes [4, 12] ([Table 2](#)).

## 146 **Ethics**

147 Local institutional review board or ethics committee approval was obtained at all local study  
148 sites. Informed consent was obtained where requested per local regulations. This project was  
149 approved by the Swiss Ethics Committee on research involving humans (swissethics, Bern,  
150 Switzerland).

## 151 **Results**

### 152 **Agreement between MGIT 960 and 7H10 agar dilution phenotypic DST**

153 [Table 3](#) and [Figure 2](#) summarize the agreement between the semi-quantitative/quantitative  
154 MIC determination by MGIT 960 and 7H10 agar dilution in terms of classifying strains as  
155 resistant or susceptible according to ECOFFs ([Table 1](#)). Agreement was high for all drugs,  
156 except ethambutol (see below). For most drugs, the MGIT 960-based MICs were higher than  
157 the 7H10 agar dilution-based MICs. MICs obtained using the two methods were within 1-2  
158 two-fold dilution steps of each other. The classifications into resistant or susceptible  
159 demonstrated high rank correlations ([Table 3](#) and [Figure 2](#)), except for capreomycin  
160 (supplementary Figure S4) due to few resistant strains included in the study.

### 161 **WGS and *in silico* resistance profile prediction**

162 A total of 176 WGS with a median coverage of 67.6X (interquartile range (IQR) = 37.48)  
163 were obtained. Median mapping percentage and percentage of genome covered were 98.7%  
164 (IQR = 0.94) and 99.4% (IQR = 0.4), respectively. All major *M. tuberculosis* lineages, except  
165 lineage 7, were represented in the study (L1 = 6, L2 = 36, L3 = 11, L4 = 123, L5 = 1, L6 = 1).  
166 The strains showed a range of drug resistance profiles ([Figure 1](#)). Based on the set of  
167 analysed genes ([Table 2](#)), 25 strains were predicted to be fully susceptible against all assayed  
168 drugs, 59 strains were mono-/poly-resistant, 91 strains demonstrated MDR phenotypes and  
169 two strains were extensively drug resistant (XDR: isoniazid, rifampicin, fluoroquinolone and  
170 aminoglycoside resistant).

### 171 **Drug resistance profile prediction by WGS vs. phenotypic DST**

172 After exclusion of known phylogenetic markers not involved in resistance, WGS-based  
173 prediction of drug resistance using a defined set of target genes (Table 2) was highly  
174 congruent with the categorical classification based on the phenotypic DST for most drugs  
175 (Table 3 and Figure 2). Based on the *in silico* resistance prediction, the MICs of mutant and  
176 wt strains frequently followed a Gaussian distribution. However, the same resistance marker  
177 may confer different MICs in different strains (supplementary Figures S1C, S2C, S3C,  
178 S8C, S9C, S10C). In some cases, the increase in the MIC conferred by a certain resistance  
179 mutation fell within the distribution of the wt MIC (e.g. for *gidB*, *eis* promoter mutations,  
180 supplementary Figures S3C, S6C).

### 181 **Distinct wt and mutant MIC distributions**

182 MIC distributions of wt and mutant strains were well separated for rifampicin, rifabutin,  
183 isoniazid, kanamycin A, amikacin, capreomycin, streptomycin and pyrazinamide, indicating  
184 that the resistance markers used had a high positive predictive power (88.9% overall positive  
185 predictive power of resistance markers). For streptomycin, two strains harboured no  
186 mutations in the target genes, yet demonstrated high-level phenotypic resistance  
187 (supplementary Figure S3C).

### 188 **Overlapping wt and mutant MIC distributions**

189 MIC distributions of wt and mutant strains overlapped for ethambutol, moxifloxacin and  
190 ethionamide. For ethambutol and ethionamide, overlapping MIC distributions of wt and  
191 mutant strains were associated with a large number of polymorphisms in resistance-  
192 conferring genes (ethambutol resistance: 22 polymorphisms in *embB*, ethionamide resistance:  
193 28 in *ethA*, 3 in *inhA*, 6 in *inhA* promoter). Solubility issues with ethionamide led to  
194 quantitative differences in MGIT 960 vs. 7H10 agar dilution-based DST (Table 3, Figure 3).  
195 The overlap in MIC distributions between wt and strains carrying an *embB* mutation was  
196 reduced by adjusting the critical concentration for ethambutol resistance from 5 mg/L to 2.5  
197 mg/L (MGIT 960). However, there was variability in the MICs for the same mutation (e.g.  
198 MIC EmbB M306I/V in 7H10 agar dilution: 4-16 mg/L –supplementary Figure S2C).  
199 Moxifloxacin resistance was rare (n = 9, MGIT 960, critical concentration 0.25 mg/L) and  
200 MIC distributions of mutant strains partially overlapped with those of wt. Sensitivity of the  
201 genome-based moxifloxacin resistance prediction was 80.0% (Table 4).

### 202 **Defining high-/low-level clinical breakpoint concentrations**



203 **Isoniazid**

204 Mutations in the promoter of *inhA* conferred low-level resistance <1 mg/L (7H10 agar  
205 dilution), compared to strains harbouring mutations in *katG* or combinations of *inhA*  
206 promoter and *katG* mutations which demonstrated MIC levels ranging from >1 mg/L to >32  
207 mg/L in 7H10 agar dilution (supplementary [Figure S8C](#)). Defining clinical breakpoint  
208 concentrations (CBC) for low- ( $\leq 1$  mg/L for MGIT 960/7H10 agar dilution) and high-level  
209 (>1 mg/L MGIT 960/7H10 agar dilution) isoniazid resistance is warranted.

210 **Rifampicin/Rifabutin**

211 Most mutations in *rpoB* increased the MIC for rifamycins beyond the therapeutic window  
212 (peak serum concentration 10 mg/L [21, 23]). However, some rare *rpoB* mutations (e.g.  
213 RpoB L452P, H445Y – supplementary [Figure 9C](#)) demonstrated MICs within the therapeutic  
214 window. Defining low- and high-level CBC may thus be justified.

215 For rifampicin, CBC were  $\leq 4/2$  mg/L for MGIT 960/7H10 agar dilution and  $>4/2$  mg/L for  
216 MGIT 960/7H10 agar dilution, respectively.

217 For rifabutin, our data suggests CBC for low- and high-level resistance of  $\leq 0.4/0.25$  or 0.5  
218 mg/L for MGIT 960/7H10 agar dilution and  $>0.4/0.25$  or 0.5 mg/L for MGIT 960/7H10 agar  
219 dilution, respectively.

220 Mutations in *rpoB* conferring resistance to rifampicin and rifabutin showed highly correlated  
221 increases ([Figure 4](#)) of MICs beyond the therapeutic window for most *rpoB* mutations  
222 ([Figure 3](#) and supplementary [Figure S9C](#) & [S10C](#)), indicating that both drugs are rendered  
223 clinically ineffective and cannot substitute each other.

224 **Amikacin**

225 Few strains had mutations in the regions of *rrs* relevant for amikacin resistance or the *eis*  
226 promoter (n=12). Mutations in *rrs* were associated with high-level (>128 mg/L in 7H10 agar  
227 dilution) and mutations in the promoter region of *eis* with low-level level (2-4 mg/L in 7H10  
228 agar dilution) amikacin resistance. Given the peak serum concentrations of amikacin (20-40  
229 mg/L [21]), a CBC for low- ( $\leq 4$  mg/L for MGIT 960/7H10 agar dilution) and high-level (4  
230 mg/L for MGIT 960/7H10 agar dilution) amikacin resistance may be warranted.

231 **Streptomycin**

232 Certain mutations lead to MICs well beyond the peak serum concentrations [21] of  
233 streptomycin (e.g. RpsL K43R, MIC 7H10 agar dilution >128 mg/L, supplementary [Figure](#)  
234 [S3C](#)). On the other hand, *gidB* mutations increase the MIC only moderately (MIC 7H10 agar  
235 dilution 1-4 mg/L, supplementary [Figure 3C](#)). Mutational combinations in *gidB*, *rrs*, *rpsL*  
236 were common and produced a range of different MICs. However, there were mutations that  
237 systematically lead to MICs beyond the therapeutic window, e.g. RpsL K43R. Defining low-  
238 level (MGIT 960  $\leq 4$  mg/L, 7H10 agar dilution  $\leq 4-8$  mg/L) and high-level CBC for  
239 streptomycin resistance (MGIT 960  $>4$  mg/L, 7H10 agar dilution  $>4-8$  mg/L) is warranted.

## 240 **Discussion**

241 We compared quantitative phenotypic DST with *in silico* or genomic resistance profile  
242 prediction inferred from WGS using 176 clinical *M. tuberculosis* isolates.

243 The results of MGIT 960 and 7H10 agar dilution-based phenotypic DST methods were  
244 highly correlated and suitable to separate susceptible from resistant variants. After exclusion  
245 of known phylogenetic markers, genome-based resistance profile prediction displayed high  
246 sensitivity and specificity for detecting resistance. Based on phenotypic DST results and  
247 WGS, we were able to define CBC for high- and low-level resistance for isoniazid,  
248 rifampicin, streptomycin and amikacin. Defining such breakpoints is important for preserving  
249 efficacious drugs for treatment of resistant *M. tuberculosis* variants.

250 Our data suggest that the current WHO-defined critical concentration for phenotypic DST of  
251 ethambutol by MGIT 960 (5 mg/L) is too high and may misclassify strains as susceptible  
252 when compared to the 7H10 agar dilution-based classification. Given the low peak serum  
253 concentrations for ethambutol, this may lead to mistreatment due to presumed ethambutol  
254 susceptibility. After adjusting the critical concentration to 2.5 mg/L for MGIT 960, we  
255 observed a strong improvement of the categorical agreement between MGIT 960- and 7H10  
256 agar dilution-based classification.

257 The mutations identified by WGS had a high predictive power to classify strains as resistant.  
258 However, the predictive power depends on a number of factors. For instance, the increase in  
259 MIC conferred by an identical resistance mutation can vary greatly in different strains (e.g.  
260 EmbB M306I/V, RpsL K88R). Such variation is clinically relevant if there is a significant  
261 overlap between the MICs of mutant and wt strains, as was the case for ethionamide,  
262 ethambutol and streptomycin (e.g. *gidB*) resistance mutations. Furthermore, it is difficult to

263 classify strains as resistant or susceptible if the MIC increase lies within the therapeutic  
264 window of a drug. The overlap between MICs of mutant and wt strains is confounded by the  
265 fact that we only screened for mutations in genes which had previously been associated with  
266 drug resistance. We might thus have missed possible resistance-conferring mutations in other  
267 genes. Additionally, WGS will always produce distributions of coverages which in term will  
268 inevitably lead to certain regions in the genome suffering from low coverage, preventing the  
269 detection of mutations. The inability to call mutations due to low coverage will therefore lead  
270 to false negatives, reducing sensitivity. Furthermore, the strain genetic background [24], non-  
271 mutational mechanisms (e.g. modulation of gene expression) [25], as well as drug efflux  
272 mechanisms [26] may contribute to the variability in increase of the MIC conferred by  
273 resistance mutations.

274 The predictive power of mutations in target genes also depends on removing phylogenetic  
275 markers not involved in resistance. Separating phylogenetic from resistance-associated  
276 markers works well for essential (highly conserved) genes such as *rpoB*, *rpsL*, *rrs* but is  
277 problematic in non-essential genes involved in the conversion of prodrugs into their active  
278 forms like *pncA* (pyrazinamide), *ethA* (ethionamide) or in genes that generally exhibit higher  
279 numbers of polymorphisms e.g. *embB*. Of note, the *embABC* operon is highly polymorphic,  
280 harbouring more polymorphisms than expected by chance (mutations in *embABC* operon =  
281 81, expected = 44.8,  $p = 9.174e-07$ , binomial test). Mutations conferring ethambutol resistance  
282 [27] will therefore inevitably evolve in the presence of phylogenetic SNPs and may interact  
283 epistatically to produce the variability in MICs we observed for wt strains and for the most  
284 common ethambutol resistance markers *embB* M306I/V. The *embABC* operon is involved in  
285 the biosynthesis of decaprenylphosphoryl- $\beta$ -d-arabinose, which is an integral component of  
286 the mycobacterial cell wall. The cell envelope interacts with the host immune system and the  
287 high levels of diversity of these genes might be the product of diversifying selection due to  
288 host immune pressure. The influence of polymorphisms in the *embABC* operon on MICs in  
289 general is supported by the observation that sub-inhibitory concentrations of ethambutol  
290 lower the MICs for isoniazid, rifampicin and streptomycin [28]. Even small changes in  
291 activity of the decaprenylphosphoryl- $\beta$ -d-arabinose biosynthetic and utilisation pathway  
292 might thus alter cell wall permeability and influence MICs of several drugs.

293 Similarly, in the case of streptomycin resistance, the RpsL substitution K88R exhibited a  
294 range in MICs from low to high-level resistance making it difficult to judge the susceptibility  
295 of a strain harbouring this mutation based on the genotype. Streptomycin was the first

296 effective antituberculous drug discovered [29] and has been used for decades. The long-term  
297 use has produced complex resistance profiles with multiple streptomycin resistance mutations  
298 (e.g. in *gidB*, *rpsL*, *rrs*) occurring concomitantly, producing wide ranges of MICs.  
299 Furthermore, many streptomycin resistant strains displayed MDR/XDR phenotypes.  
300 Streptomycin resistance mutations are frequently found in backgrounds which have mutations  
301 in genes affecting the information pathway (DNA → RNA → proteins) – e.g. *gyrA* (DNA  
302 gyrase), *rpoB* (DNA-dependent RNA polymerase), *rrs* (ribosomal RNA). The simultaneous  
303 presence of multiple resistance mutations may alter the adaptive landscape [30, 31]. In  
304 addition, non-mutational processes (e.g. alteration of gene expression) may compensate for  
305 fitness costs of drug resistance and at the same time alter the MIC for the drug [25]. This has  
306 not been demonstrated for streptomycin resistance in *M. tuberculosis*, but it seems possible  
307 that compensation of fitness costs in MDR phenotypes might alter the MIC for streptomycin  
308 [30], considering that streptomycin is not part of the current standard treatment regimen and  
309 selection for high-level streptomycin resistance is relaxed.

310 In conclusion, we demonstrate that MGIT 960 and 7H10 agar dilution-based phenotypic DST  
311 provide highly congruent classifications of strains into resistant or susceptible. WGS has high  
312 predictive power to infer resistance profiles without the need for time-consuming phenotypic  
313 methods. Limitations due to overlapping distributions of wt and mutant MICs, varying MICs  
314 for the same resistance mutations in different strains, presence of phylogenetic markers in  
315 resistance-associated genes and rare resistance markers with low frequencies will likely be  
316 resolved by on-going large-scale projects (e.g. ReSeqTB [32]) combining phenotypic DST  
317 with WGS of thousands of *M. tuberculosis* isolates. Our findings, together with those of on-  
318 going studies will pave the way for the replacement of phenotypic DST with drug resistance  
319 profile prediction based on WGS in the coming years.

## 320 **Acknowledgements**

321 We would like to thank Alexandra Mushegian for critically reading the manuscript and  
322 improving the writing. Whole genome analysis was performed at sciCORE  
323 (<http://scicore.unibas.ch/>) scientific computing core facility at University of Basel.

## 324 **Funding**

325 This work was supported by the European Research Council [grant number 309540-  
326 EVODRTB], the Swiss National Science Foundation [IZRJZ3\_164171, 310030-166687,

327 IZLSZ3\_170834, CRSII5\_177163, 31003A\_153349 and 320030\_153442/1] and  
328 SystemsX.ch. The International epidemiology Databases to Evaluate AIDS (IeDEA) is  
329 supported by the National Institutes of Allergy and Infectious Diseases (NIAID) under award  
330 numbers U01 AI096299, U01 AI069919, U01 AI069924, U01 AI069911, U01 AI069907,  
331 U01 AI096186, and U01 AI069923. The content of this publication is solely the  
332 responsibility of the authors and does not necessarily represent the official views of any of  
333 the governments or institutions mentioned above.  
334

### 335 **Conflict of interest**

336 Peter M. Keller reports travel grants by Copan Italia SpA outside of the submitted work. Erik  
337 C. Böttger is a consultant for AID Diagnostics.  
338

### 339 **Tables**

340

341

| <b>Antibiotic</b> | <b>ECOFF<br/>agar<br/>dilution<br/>(mg/L)</b> | <b>ECOFF<br/>MGIT<br/>960<br/>(mg/L)</b> |
|-------------------|-----------------------------------------------|------------------------------------------|
| Ethionamide       | 1                                             | 5                                        |
| Ethambutol        | 2                                             | 5                                        |
| Capreomycin       | 4                                             | 2.5                                      |
| Streptomycin      | 0.5                                           | 1                                        |
| Kanamycin A       | 2                                             | 2                                        |
| Amikacin          | 1                                             | 1                                        |
| Moxifloxacin      | 0.25                                          | 0.25                                     |
| Isoniazid         | 0.125                                         | 0.1                                      |
| Rifampicin        | 0.5                                           | 1                                        |
| Rifabutin         | 0.0625                                        | 0.1                                      |
| Pyrazinamide      | NA                                            | 100                                      |

Table 1 Epidemiological cutoffs (ECOFF) used for 7H10 agar dilution and MGIT 960 phenotypic DST [14]

| <b>Drug</b>          | <b>Target gene(s)</b>                 |
|----------------------|---------------------------------------|
| Ethionamide          | <i>ethA, inhA, inhA</i> promoter      |
| Ethambutol           | <i>embB</i>                           |
| Capreomycin          | <i>rrs, eis</i> promoter, <i>tlyA</i> |
| Streptomycin         | <i>rrs, gidB, rpsL</i>                |
| Kanamycin A          | <i>rrs, eis</i> promoter              |
| Amikacin             | <i>rrs, eis</i> promoter              |
| Moxifloxacin         | <i>gyrA</i>                           |
| Isoniazid            | <i>katG, inhA</i> promoter            |
| Rifampicin/rifabutin | <i>rpoB</i>                           |
| Pyrazinamide         | <i>pncA, pncA</i> promoter            |

Table 2 List of genes implicated in drug resistance in *M. tuberculosis* which were screened for polymorphisms by WGS. List adapted from [3, 21]

| <b>Antibiotic</b> | <b>n</b> | <b>Categorical agreement (%)</b> | <b>SD of <math>\log_2(\text{MIC MGIT 960/MIC agar dilution})</math></b> | <b><math>\gamma</math></b> |
|-------------------|----------|----------------------------------|-------------------------------------------------------------------------|----------------------------|
| Ethionamide       | 56       | 95                               | $1.9 \pm 0.3$                                                           | 0.91                       |
| Ethambutol        | 171      | 73                               | $1.9 \pm 0.5$                                                           | 0.94                       |
| Capreomycin       | 56       | 98                               | $1.5 \pm 0.5$                                                           | 0.65                       |
| Streptomycin      | 56       | 93                               | $1.5 \pm 0.3$                                                           | 0.98                       |
| Kanamycin A       | 56       | 98                               | $1.2 \pm 0.2$                                                           | 0.8                        |
| Amikacin          | 174      | 98                               | $1.4 \pm 0.6$                                                           | 1                          |
| Moxifloxacin      | 173      | 99                               | $1 \pm 0.2$                                                             | 1                          |
| Isoniazid         | 173      | 96                               | $1.2 \pm 0.1$                                                           | 1                          |
| Rifampicin        | 174      | 99                               | NA                                                                      | 1                          |
| Rifabutin         | 56       | 96                               | $0.8 \pm 0.1$                                                           | 0.98                       |

Table 3 Summary statistics of the method agreement between 7H10 agar dilution- and MGIT 960-based phenotypic DST for all drugs assayed in this study

| <b>Drug</b>  | <b>Sensitivity (%)</b> | <b>Specificity (%)</b> |
|--------------|------------------------|------------------------|
| Ethionamide  | 75.0                   | 92.9                   |
| Ethambutol   | 89.6                   | 94.2                   |
| Capreomycin  | 75.0                   | 94                     |
| Streptomycin | 68.0                   | 92.1                   |
| Kanamycin A  | 83.3                   | 98.8                   |
| Amikacin     | 63.6                   | 96.9                   |
| Moxifloxacin | 80.0                   | 90.2                   |
| Isoniazid    | 93.6                   | 96.8                   |
| Rifampicin   | 100                    | 94.0                   |
| Rifabutin    | 98.9                   | 94.0                   |
| Pyrazinamide | 80.8                   | 88.9                   |

Table 4 Sensitivity and specificity of the genome-based drug resistance profile prediction using the 7H10 agar dilution-based categorical classification as the gold standard for all drugs except pyrazinamide, for which the MGIT 960 categorical classification was used

## 362 References

- 363 1. World Health Organization. Treatment of tuberculosis: Guidelines [Internet]. 4th Editio. Treat. Tuberc.  
364 Guidel. 2010.Available from: <http://www.ncbi.nlm.nih.gov/books/NBK138741/#ch2.s3>.
- 365 2. Domínguez J, Boettger EC, Cirillo D, Cobelens F, Eisenach KD, Gagneux S, Hillemann D, Horsburgh  
366 R, Molina-Moya B, Niemann S, Tortoli E, Whitelaw A, Lange C, TBNET, RESIST-TB networks.  
367 Clinical implications of molecular drug resistance testing for Mycobacterium tuberculosis: a  
368 TBNET/RESIST-TB consensus statement. *Int. J. Tuberc. Lung Dis.* [Internet] 2016; 20: 24–42Available  
369 from: <http://www.ncbi.nlm.nih.gov/pubmed/26688526>.
- 370 3. Gygli SM, Borrell S, Trauner A, Gagneux S. Antimicrobial resistance in Mycobacterium tuberculosis:  
371 mechanistic and evolutionary perspectives. *FEMS Microbiol. Rev.* [Internet] 2017; : 1–20Available  
372 from: <https://academic.oup.com/femsre/article-lookup/doi/10.1093/femsre/fux011>.
- 373 4. Deggim-Messmer V, Bloemberg G V., Ritter C, Voit A, Hömke R, Keller PM, Böttger EC. Diagnostic  
374 Molecular Mycobacteriology in Regions With Low Tuberculosis Endemicity: Combining Real-time  
375 PCR Assays for Detection of Multiple Mycobacterial Pathogens With Line Probe Assays for  
376 Identification of Resistance Mutations. *EBioMedicine* [Internet] The Authors; 2016; 9: 228–  
377 237Available from: <http://dx.doi.org/10.1016/j.ebiom.2016.06.016>.
- 378 5. Nathavitharana RR, Hillemann D, Schumacher SG, Schlueter B, Ismail N, Omar SV, Sikhondze W,  
379 Havumaki J, Valli E, Boehme C, Denkinge CM. Multicenter noninferiority evaluation of hain  
380 GenoType MTBDRplus Version 2 and Nipro NTM+MDRTB line probe assays for detection of rifampin  
381 and isoniazid resistance. *J. Clin. Microbiol.* 2016; 54: 1624–1630.
- 382 6. Ritter C, Lucke K, Sirgel FA, Warren RW, van Helden PD, Böttger EC, Bloemberg G V. Evaluation of  
383 the AID TB Resistance Line Probe Assay for Rapid Detection of Genetic Alterations Associated with  
384 Drug Resistance in Mycobacterium tuberculosis Strains. *J. Clin. Microbiol.* [Internet] 2014; 52: 940–  
385 946Available from: <http://jcm.asm.org/cgi/doi/10.1128/JCM.02597-13>.
- 386 7. WHO. Automated Real-Time Nucleic Acid Amplification Technology for Rapid and Simultaneous  
387 Detection of Tuberculosis and Rifampicin Resistance: Xpert MTB/RIF Assay for the Diagnosis of  
388 Pulmonary and Extrapulmonary TB in Adults and Children: Policy Update [Internet]. Autom. Real-  
389 Time Nucleic Acid Amplif. Technol. Rapid Simultaneous Detect. Tuberc. Rifampicin Resist. Xpert  
390 MTB/RIF Assay Diagnosis Pulm. Extrapulm. TB Adults Child. Policy Updat. 2013.Available from:  
391 <http://www.ncbi.nlm.nih.gov/pubmed/25473701>.
- 392 8. Engström A. Fighting an old disease with modern tools: characteristics and molecular detection methods  
393 of drug-resistant Mycobacterium tuberculosis. *Infect. Dis. (London, England)* [Internet] 2015; 4235: 1–  
394 17Available from: <http://www.ncbi.nlm.nih.gov/pubmed/26167849>.
- 395 9. Streicher EM, Bergval I, Dheda K, Böttger EC, Gey Van Pittius NC, Bosman M, Coetzee G, Anthony  
396 RM, Van Helden PD, Victor TC, Warren RM. Mycobacterium tuberculosis population structure  
397 determines the outcome of genetics-based second-line drug resistance testing. *Antimicrob. Agents  
398 Chemother.* 2012; 56: 2420–2427.
- 399 10. Coll F, McNerney R, Preston MD, Guerra-Assunção JA, Warry A, Hill-Cawthorne G, Mallard K, Nair  
400 M, Miranda A, Alves A, Perdigão J, Viveiros M, Portugal I, Hasan Z, Hasan R, Glynn JR, Martin N,  
401 Pain A, Clark TG. Rapid determination of anti-tuberculosis drug resistance from whole-genome  
402 sequences. *Genome Med.* [Internet] 2015; 7: 51Available from:  
403 <http://genomemedicine.com/content/7/1/51>.
- 404 11. Walker TM, Kohl TA, Omar S V, Hedge J, Del C, Elias O, Bradley P, Iqbal Z, Feuerriegel S, Niehaus  
405 KE, Wilson DJ, Clifton DA, Kapatai G, Ip CLC, Bowden R, Drobniewski FA, Allix-béguec C, Gaudin  
406 C, Parkhill J, Diel R, Supply P, Crook DW, Smith EG, Walker AS, Ismail N, Niemann S. Whole-  
407 genome sequencing for prediction of Mycobacterium tuberculosis drug susceptibility and resistance□: a  
408 retrospective cohort study. 2015; 3099: 1–10.
- 409 12. Shea J, Halse TA, Lapierre P, Shudt M, Kohlerschmidt D, Van Roey P, Limberger R, Taylor J, Escuyer  
410 V, Musser KA. Comprehensive Whole-Genome Sequencing and Reporting of Drug Resistance Profiles

- 411 on Clinical Cases of Mycobacterium tuberculosis in New York State. *J. Clin. Microbiol.* [Internet]  
412 2017; 55: 1871–1882 Available from:  
413 <http://jcm.asm.org/content/55/6/1871.full.pdf%0Ahttp://ovidsp.ovid.com/ovidweb.cgi?T=JS&PAGE=re>  
414 [ference&D=emexa&NEWS=N&AN=616382615](http://jcm.asm.org/content/55/6/1871.full.pdf%0Ahttp://ovidsp.ovid.com/ovidweb.cgi?T=JS&PAGE=reference&D=emexa&NEWS=N&AN=616382615).
- 415 13. Colman RE, Anderson J, Lemmer D, Lehmkuhl E, Georghiou SB, Heaton H, Wiggins K, Gillece JD,  
416 Schupp JM, Catanzaro DG, Crudu V, Cohen T, Rodwell TC, Engelthaler DM. Rapid Drug  
417 Susceptibility Testing of Drug Resistant Mycobacterium tuberculosis Directly from Clinical Samples  
418 using Amplicon Sequencing: A Proof of Concept Study. *J. Clin. Microbiol.* [Internet] 2016; 54:  
419 JCM.00535-16 Available from: [http://jcm.asm.org/lookup/doi/10.1128/JCM.00535-](http://jcm.asm.org/lookup/doi/10.1128/JCM.00535-16)  
420 [16%5Cnhttps://github.com/TGenNorth/SMOR](http://jcm.asm.org/lookup/doi/10.1128/JCM.00535-16).
- 421 14. Springer B, Lucke K, Calligaris-Maibach R, Ritter C, Böttger EC. Quantitative drug susceptibility  
422 testing of Mycobacterium tuberculosis by use of MGIT 960 and EpiCenter instrumentation. *J. Clin.*  
423 *Microbiol.* 2009; 47: 1773–1780.
- 424 15. Stucki D, Ballif M, Egger M, Furrer H, Altpeter E, Battegay M, Droz S, Bruderer T, Coscolla M,  
425 Borrell S, Zürcher K, Janssens J-P, Calmy A, Mazza Stalder J, Jatton K, Rieder HL, Pfyffer GE, Siegrist  
426 HH, Hoffmann M, Fehr J, Dolina M, Frei R, Schrenzel J, Böttger EC, Gagneux S, Fenner L. Standard  
427 Genotyping Overestimates Transmission of Mycobacterium tuberculosis among Immigrants in a Low-  
428 Incidence Country. Carroll KC, editor. *J. Clin. Microbiol.* [Internet] 2016; 54: 1862–1870 Available  
429 from: <http://jcm.asm.org/lookup/doi/10.1128/JCM.00126-16>.
- 430 16. Bloemberg G V., Keller PM, Stucki D, Trauner A, Borrell S, Latshang T, Coscolla M, Rothe T, Hömke  
431 R, Ritter C, Feldmann J, Schulthess B, Gagneux S, Böttger EC. Acquired Resistance to Bedaquiline and  
432 Delamanid in Therapy for Tuberculosis. *N. Engl. J. Med.* [Internet] 2015; 373: 1986–1988 Available  
433 from: <http://www.ncbi.nlm.nih.gov/pubmed/26559594>.
- 434 17. Egger M, Ekouevi DK, Williams C, Lyamuya RE, Mukumbi H, Braitstein P, Hartwell T, Graber C, Chi  
435 BH, Boulle A, Dabis F, Wools-Kaloustian K. Cohort Profile: The international epidemiological  
436 databases to evaluate AIDS (IeDEA) in sub-Saharan Africa. *Int. J. Epidemiol.* [Internet] 2012; 41:  
437 1256–1264 Available from: <https://academic.oup.com/ije/article-lookup/doi/10.1093/ije/dyr080>.
- 438 18. World Health Organization. Technical Report on critical concentrations for drug susceptibility testing of  
439 medicines used in the treatment of drug-resistant tuberculosis [Internet]. 2018. Available from:  
440 <http://www.who.int/iris/handle/10665/260470>.
- 441 19. Delignette-Muller ML, Dutang C. fitdistrplus: an R package for fitting distributions. *J. Stat. Softw.*  
442 2015; 64: 1--34.
- 443 20. Martin Bland J, Altman D. STATISTICAL METHODS FOR ASSESSING AGREEMENT BETWEEN  
444 TWO METHODS OF CLINICAL MEASUREMENT. *Lancet* [Internet] 1986; 327: 307–310 Available  
445 from: <http://www.sciencedirect.com/science/article/pii/S0140673686908378>.
- 446 21. Böttger EC. The ins and outs of Mycobacterium tuberculosis drug susceptibility testing. *Clin. Microbiol.*  
447 *Infect.* [Internet] 2011; 17: 1128–1134 Available from:  
448 <http://linkinghub.elsevier.com/retrieve/pii/S1198743X14629396>.
- 449 22. Ghielmetti G, Coscolla M, Ruetten M, Friedel U, Loiseau C, Feldmann J, Steinmetz HW, Stucki D,  
450 Gagneux S. Tuberculosis in Swiss captive Asian elephants: microevolution of Mycobacterium  
451 tuberculosis characterized by multilocus variable-number tandem-repeat analysis and whole-genome  
452 sequencing. *Sci. Rep.* [Internet] 2017; 7: 14647 Available from: [http://www.nature.com/articles/s41598-](http://www.nature.com/articles/s41598-017-15278-9)  
453 [017-15278-9](http://www.nature.com/articles/s41598-017-15278-9).
- 454 23. Sekaggya-Wiltshire C, von Braun A, Lamorde M, Ledergerber B, Buzibye A, Henning L, Musaaazi J,  
455 Gutteck U, Denti P, de Kock M, Jetter A, Byakika-Kibwika P, Eberhard N, Matovu J, Joloba M, Muller  
456 D, Manabe YC, Kanya MR, Corti N, Kambugu A, Castelnovo B, Fehr JS. Delayed Sputum  
457 Conversion in TB-HIV Co-Infected Patients with Low Isoniazid and Rifampicin Concentrations. *Clin.*  
458 *Infect. Dis.* [Internet] 2018; Available from: [https://academic.oup.com/cid/advance-](https://academic.oup.com/cid/advance-article/doi/10.1093/cid/ciy179/4919550)  
459 [article/doi/10.1093/cid/ciy179/4919550](https://academic.oup.com/cid/advance-article/doi/10.1093/cid/ciy179/4919550).
- 460 24. Fenner L, Egger M, Bodmer T, Altpeter E, Zwahlen M, Jatton K, Pfyffer GE, Borrell S, Dubuis O,



- 461 Bruderer T, Siegrist HH, Furrer H, Calmy A, Fehr J, Stalder JM, Ninet B, Bottger EC, Gagneux S.  
462 Effect of Mutation and Genetic Background on Drug Resistance in Mycobacterium tuberculosis.  
463 *Antimicrob. Agents Chemother.* [Internet] 2012 [cited 2013 Aug 9]; 56: 3047–3053 Available from:  
464 <http://www.pubmedcentral.nih.gov/articlerender.fcgi?artid=3370767&tool=pmcentrez&rendertype=abstract>.  
465
- 466 25. Freihofer P, Akbergenov R, Teo Y, Juskeviciene R, Andersson DI, Böttger EC. Nonmutational  
467 compensation of the fitness cost of antibiotic resistance in mycobacteria by overexpression of tlyA  
468 rRNA methylase. *RNA* [Internet] 2016; 22: 1836–1843 Available from:  
469 <https://www.ncbi.nlm.nih.gov/pubmed/27698071>.
- 470 26. da Silva PEA, Machado D, Ramos D, Couto I, Von Groll A, Viveiros M. Efflux Pumps in  
471 Mycobacteria: Antimicrobial Resistance, Physiological Functions, and Role in Pathogenicity. In: Li X-  
472 Z, Elkins CA, Zgurskaya HI, editors. *Efflux-Mediated Antimicrob. Resist. Bact.* [Internet] Cham:  
473 Springer International Publishing; 2016. p. 527–559 Available from:  
474 <http://link.springer.com/10.1007/978-3-319-39658-3>.
- 475 27. Safi H, Lingaraju S, Amin A, Kim S, Jones M, Holmes M, McNeil M, Peterson SN, Chatterjee D,  
476 Fleischmann R, Alland D. Evolution of high-level ethambutol-resistant tuberculosis through interacting  
477 mutations in decaprenylphosphoryl- $\beta$ -D-Arabinose biosynthetic and utilization pathway genes. *Nat.*  
478 *Genet.* [Internet] Nature Publishing Group; 2013; 45: 1190–1197 Available from:  
479 <http://dx.doi.org/10.1038/ng.2743>.
- 480 28. Jagannath C, Reddy VM, Gangadharam PRJ. Enhancement of drug susceptibility of multi-drug resistant  
481 strains of Mycobacterium tuberculosis by ethambutol and dimethyl sulphoxide. *J. Antimicrob.*  
482 *Chemother.* [Internet] 1995; 35: 381–390 Available from: [https://academic.oup.com/jac/article-](https://academic.oup.com/jac/article-lookup/doi/10.1093/jac/35.3.381)  
483 [lookup/doi/10.1093/jac/35.3.381](https://academic.oup.com/jac/article-lookup/doi/10.1093/jac/35.3.381).
- 484 29. Schatz A, Bugle E, Waksman SA. Streptomycin, a Substance Exhibiting Antibiotic Activity Against  
485 Gram-Positive and Gram-Negative Bacteria. *Exp. Biol. Med.* 1944; 55: 66–69.
- 486 30. Moura de Sousa J, Balbontín R, Durão P, Gordo I. Multidrug-resistant bacteria compensate for the  
487 epistasis between resistances. de Visser A, editor. *PLoS Biol.* [Internet] 2017; 15: e2001741 Available  
488 from: <http://dx.plos.org/10.1371/journal.pbio.2001741>.
- 489 31. Borrell S, Teo Y, Giardina F, Streicher EM, Klopper M, Feldmann J, Muller B, Victor TC, Gagneux S.  
490 Epistasis between antibiotic resistance mutations drives the evolution of extensively drug-resistant  
491 tuberculosis. *Evol. Med. Public Heal.* [Internet] 2013 [cited 2013 May 30]; 2013: 65–74 Available from:  
492 <http://emph.oxfordjournals.org/cgi/doi/10.1093/emph/eot003>.
- 493 32. Starks AM, Avilés E, Cirillo DM, Denkinger CM, Dolinger DL, Emerson C, Gallarda J, Hanna D, Kim  
494 PS, Liwski R, Miotto P, Schito M, Zignol M. Collaborative Effort for a Centralized Worldwide  
495 Tuberculosis Relational Sequencing Data Platform: Figure 1. *Clin. Infect. Dis.* [Internet] 2015; 61:  
496 S141–S146 Available from: <https://academic.oup.com/cid/article-lookup/doi/10.1093/cid/civ610>.
- 497

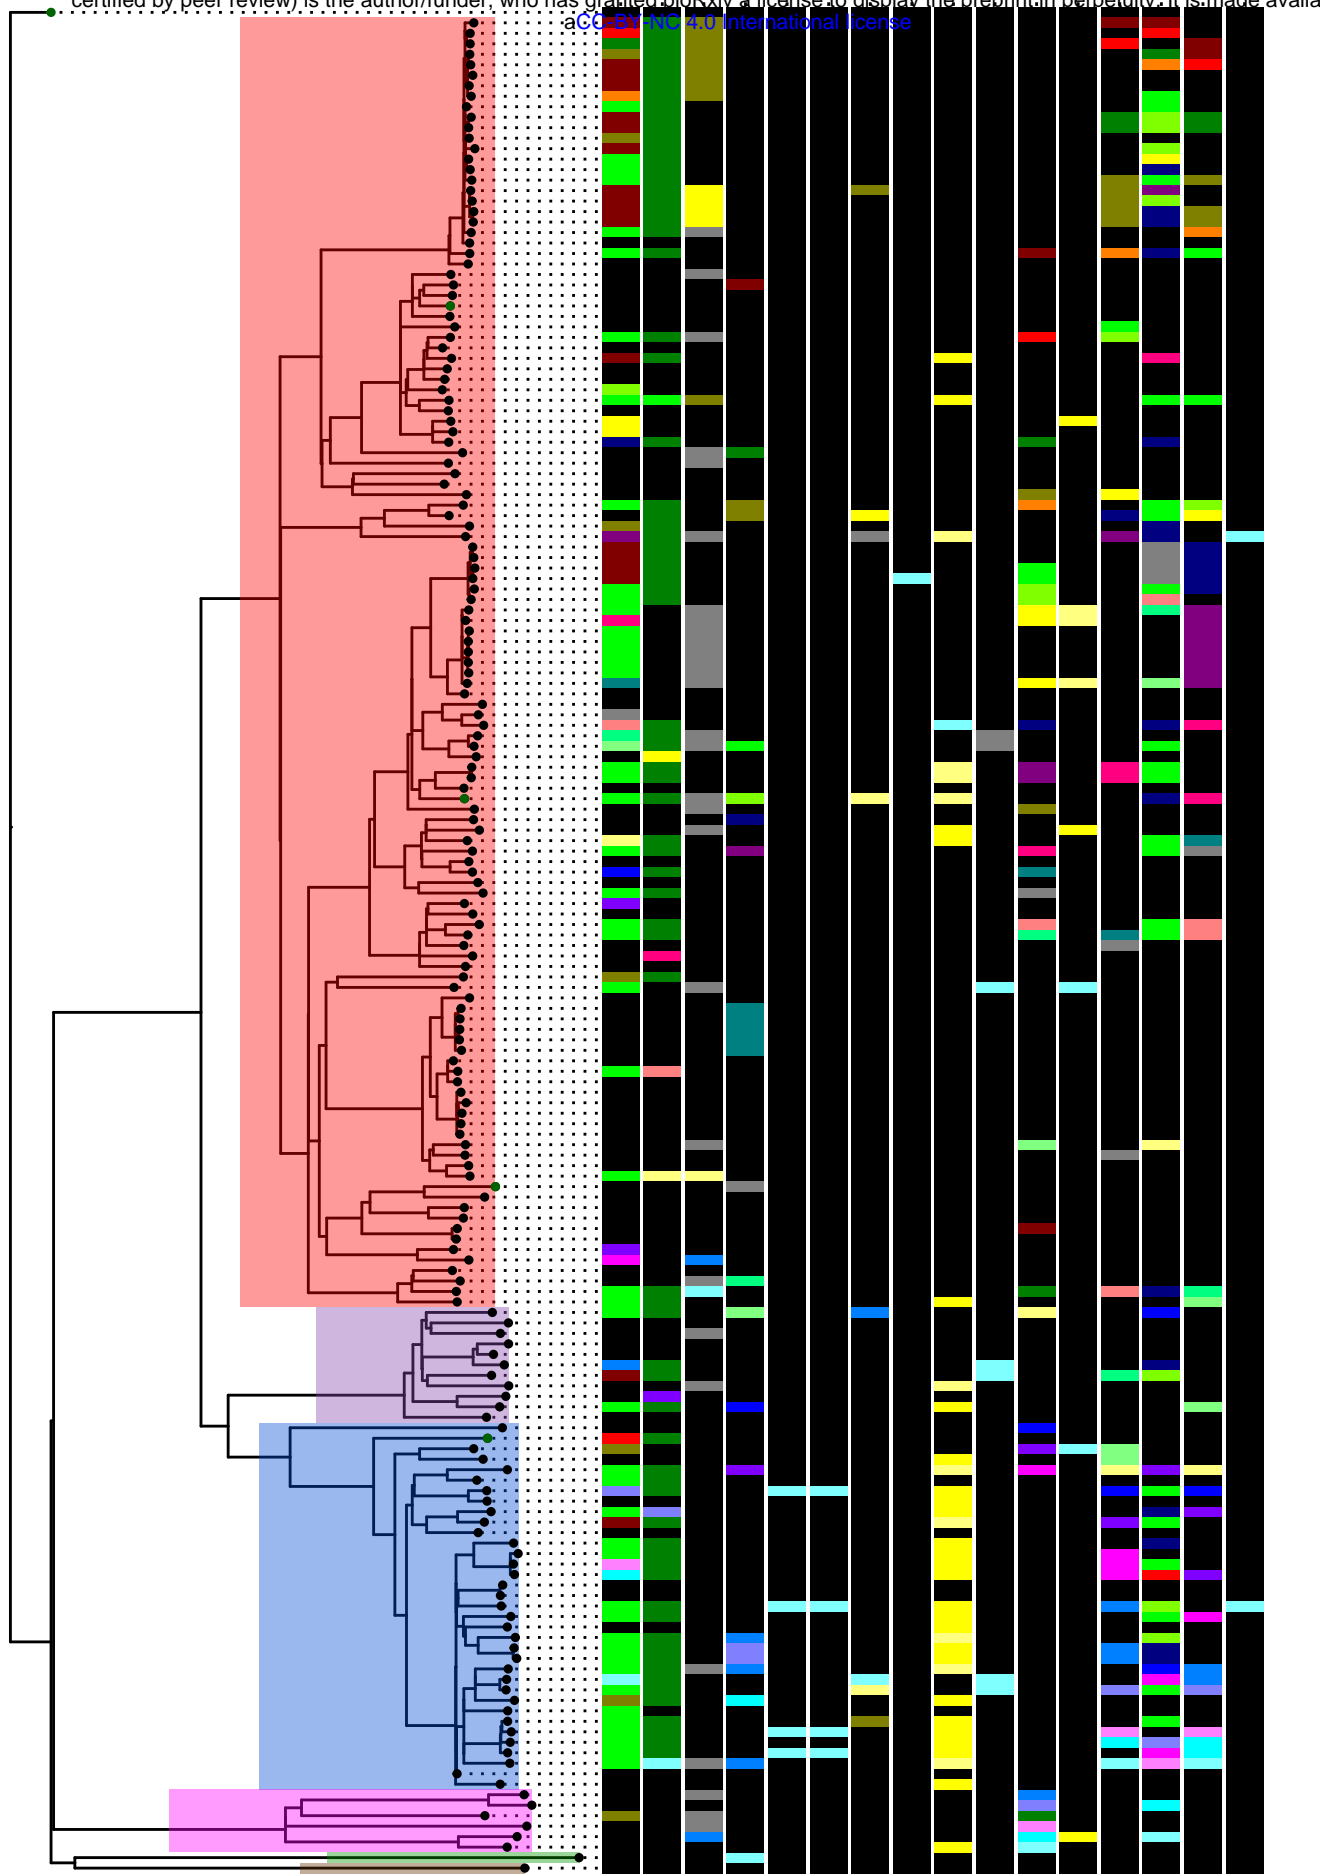

0.005 Figure 1 Maximum likelihood phylogeny of 176 *M. tuberculosis* strains based on 20510 variable positions. Reference strains labeled with green tip labels. Main lineages are highlighted as follows: red L4, purple L3, blue L2, pink L1, green L6, brown L5. Scale bar indicates number of substitutions per site. Phylogeny rooted on *M. canettii*. Colored bars indicate resistance mutations per gene and within a distinct column (gene) each colored bar represents a distinct mutation. Black bars indicate no mutation, i.e. wt.

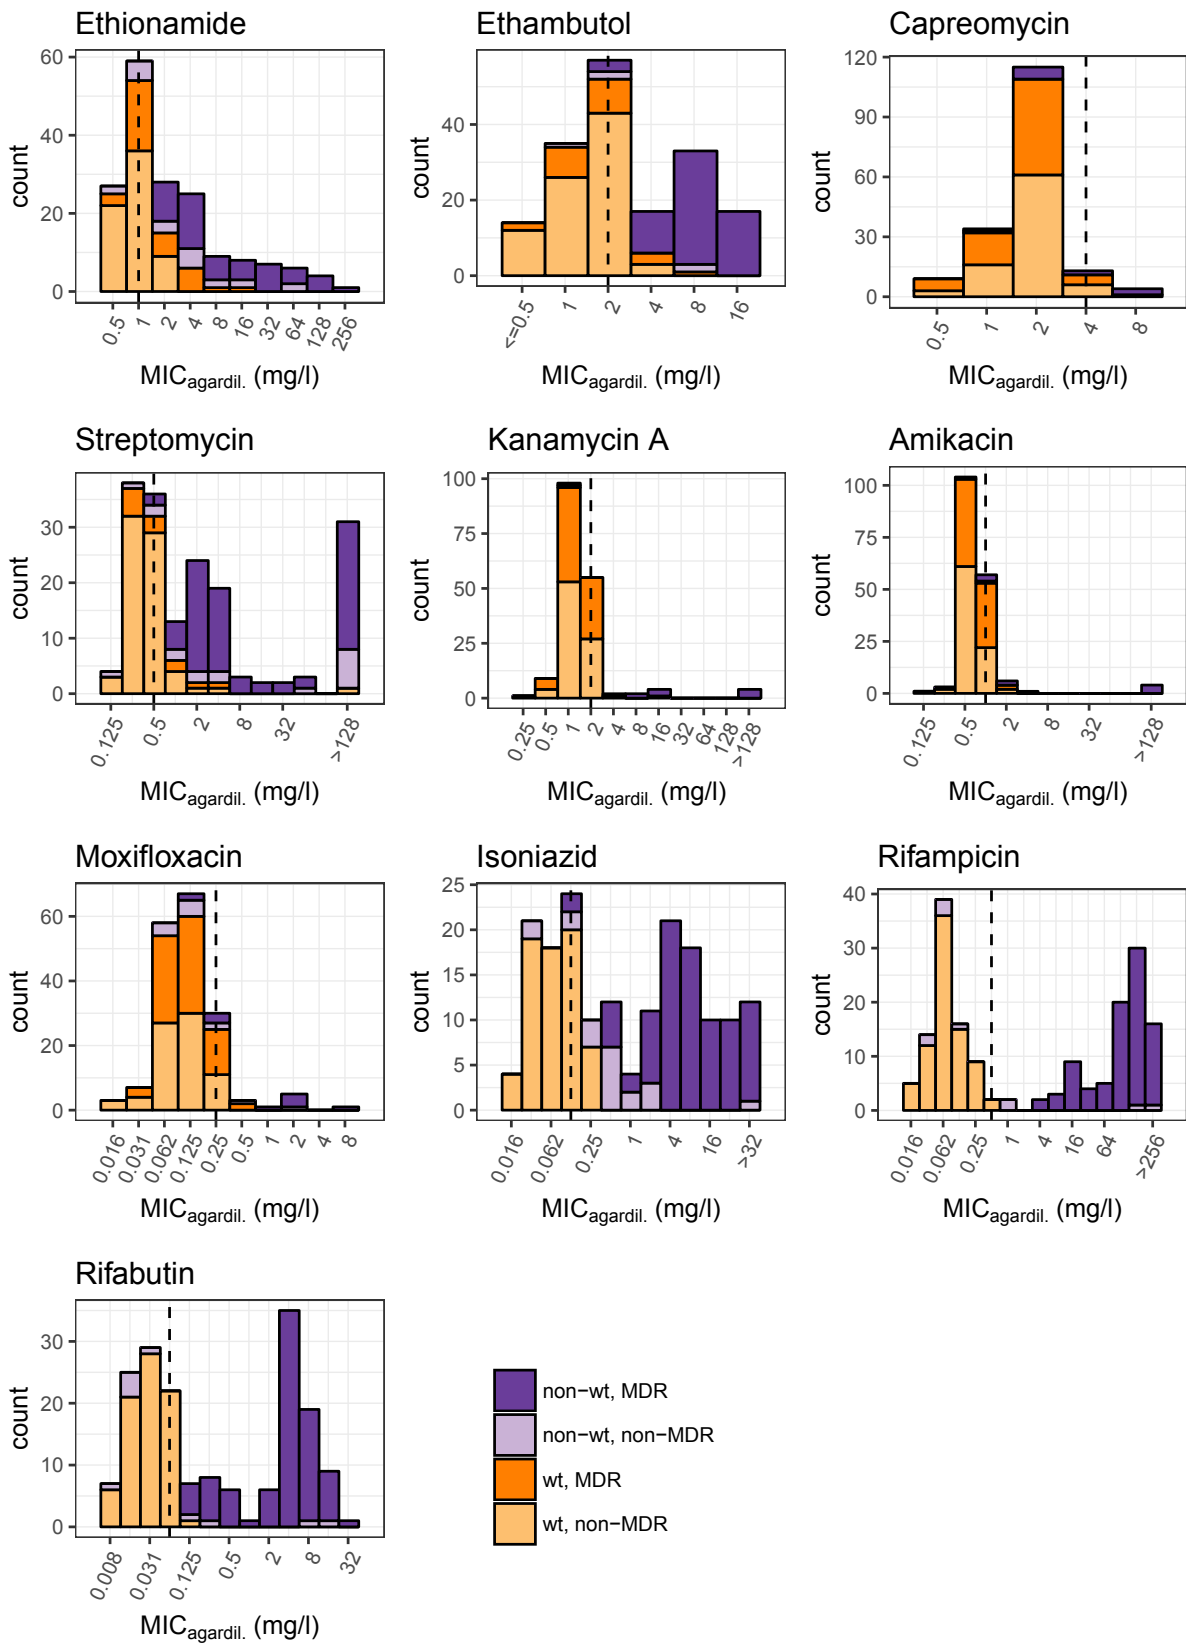

**Figure 2** Histograms of MICs (7H10 agar dilution) for all drugs assayed in this study

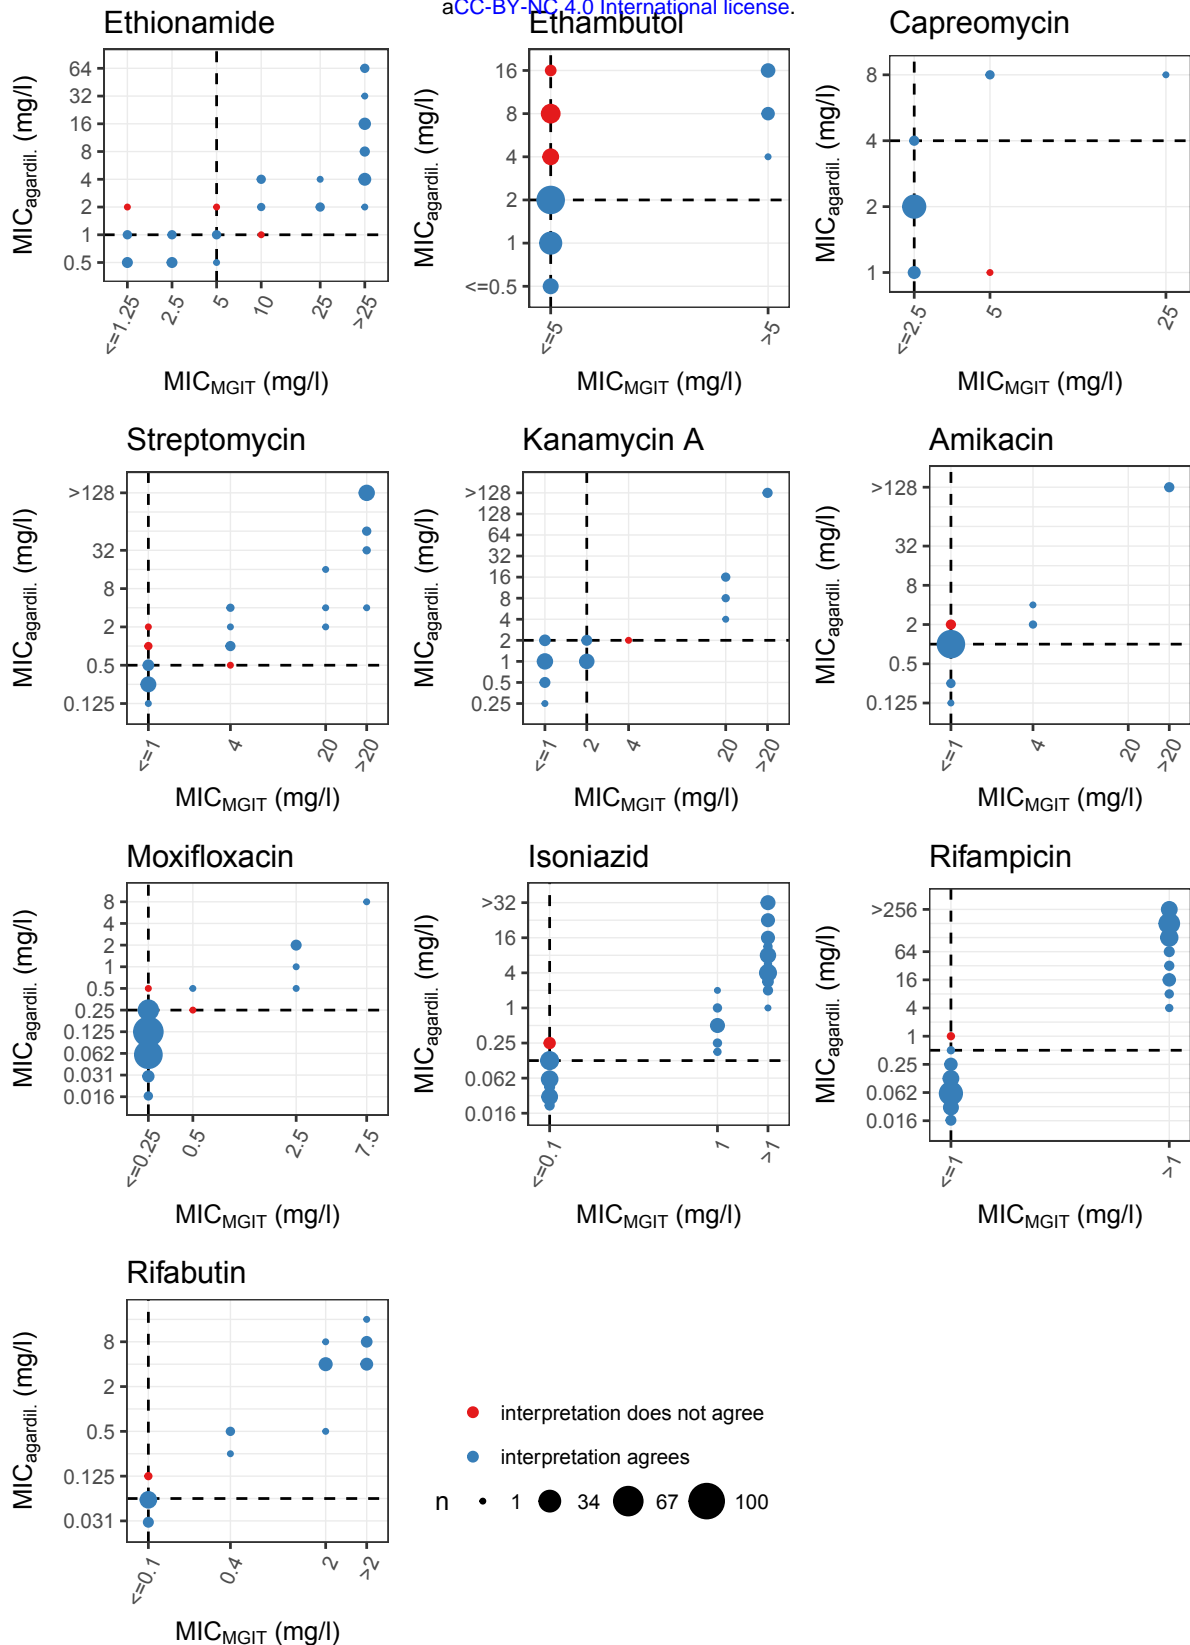

**Figure 3** Method agreement between phenotypic DST performed with MGIT 960 and 7H10 agar dilution represented as Bland-Altman plots for all drugs tested in this study.

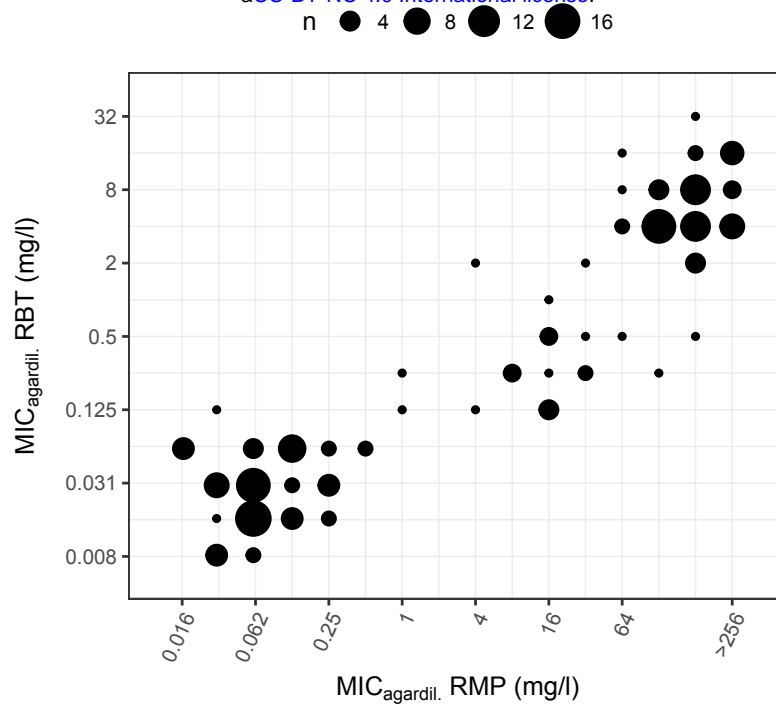

**Figure 4** Correlation between 7H10 agar dilution MICs for rifampicin and rifabutin
